# Supplementary material
Source: ML conference proceedings conference paper supplement (https://proceedings.neurips.cc/paper_files/paper/2022/hash/165bbd0a0a1b9470ec34d5afec582d2e-Abstract.html)
Supplement: Supplementary file 1 [file 165bbd0a0a1b9470ec34d5afec582d2e-Supplemental-Conference.zip]

Archive with 2 entries (2 files):
- 8106_appendix.pdf
- __MACOSX/._8106_appendix.pdf
